# Supplementary material
Source: PubMed Central journal article supplement (PMC7934908)
Supplement: NIHMS1672028-supplement-1.pdf [file NIHMS1672028-supplement-1.pdf]

502  
503  
504  
505  
506  
507  
508  
509

Online Supplement

Association of Blood Pressure and Cognition after Stroke

Deborah A. Levine MD, MPH<sup>1</sup>; Andrzej Galecki, PhD<sup>1</sup>; Dolorence Okullo MHI<sup>1</sup>; Emily  
Briceno-Abreu, PhD<sup>1</sup>; Mohammed U. Kabeto, MS<sup>1</sup>; Lewis Morgenstern, MD<sup>1</sup>; Kenneth  
M. Langa, MD, PhD<sup>1,2</sup>; Bruno Giordani, PhD<sup>1</sup>; Robert Brook, MD<sup>1</sup>; Brisa Sanchez, PhD<sup>1</sup>;  
Lynda Lisabeth, PhD<sup>1</sup>

## BASIC Study Blood Pressure Protocol

510  
511  
512  
513  
514  
515  
516  
517  
518  
519  
520  
521  
522  
523  
524  
525  
526  
527  
528  
529  
530  
531  
532

### **Blood Pressure Device**

Blood pressure (BP) will be measured using a standard automated BP measurement arm monitor (*OmRON* model 700 series; Omron, Mannheim, Germany), that has been validated by the Association for the Advancement of Medical Instrumentation to be accurate. If the arm circumference is less than or equal to 17 inches, then the blood pressure will be measured with the regular/large adult cuff placed at the upper arm. If the arm circumference is greater than 17 inches, then the blood pressure will be measured with the regular/large adult cuff placed at the forearm.

### **Blood Pressure Measurement**

Following a 5-minute rest, blood pressure will be measured in the right arm of seated participants at three 15-second intervals using an appropriately sized cuff. Whenever possible, the participant will be seated in a chair, with legs supported uncrossed on the ground, back supported by the chair, arm supported on a table/pillows and resting at heart level (elbow should be resting out straight supported at mid-chest level – or somewhere between shoulders and nipple level). Tobacco use, strenuous physical activity and intake of caffeine and alcohol are proscribed for 1 hour before measurement. We will record the arm of measurement (left/right), the 3 BP readings, patient position (sitting or lying down), and the measurement location (upper arm or forearm).

**Supplemental Table 1: Fully Adjusted Differences in Cognition 90 days after Stroke by Covariates: Brain Attack Surveillance in Corpus Christi Project, 2011-2013**

| Coefficient                                         | Estimates (95% Confidence Intervals)  |                                    |                                       |                                       |
|-----------------------------------------------------|---------------------------------------|------------------------------------|---------------------------------------|---------------------------------------|
|                                                     | 3MSE<br>(n=432)                       | AFT<br>(n=431)                     | Trails A<br>(n=335)                   | Trails B<br>(n=283)                   |
| SBP per 10 mmHg increase                            | -0.01<br>(-0.05, 0.04)<br>P=0.74      | -0.03<br>(-0.22, 0.15)<br>P=0.72   | -0.003<br>(-0.02, 0.01)<br>P=0.68     | -0.005<br>(-0.01, 0.001)<br>P=0.10    |
| DBP per 10 mmHg increase                            | 0.06<br>(-0.03, 0.15)<br>P=0.17       | 0.13<br>(-0.24, 0.51)<br>P=0.48    | 0.01<br>(-0.02, 0.04)<br>P=0.46       | 0.01<br>(0.0001, 0.03)<br>P=0.05      |
| Age per 1 year increase                             | -0.022<br>(-0.029, -0.015)<br>P<0.001 | -0.04<br>(-0.07, -0.01)<br>P=0.005 | -0.007<br>(-0.009, -0.005)<br>P<0.001 | -0.002<br>(-0.003, -0.001)<br>P<0.001 |
| Education                                           |                                       |                                    |                                       |                                       |
| <High school                                        | Referent                              | Referent                           | Referent                              | Referent                              |
| High school graduate vs <high school                | 0.36<br>(0.19, 0.54)<br>P<0.001       | 0.98<br>(0.25, 1.71)<br>P=0.009    | 0.06<br>(0.01, 0.11)<br>P=0.03        | 0.03<br>(0.005, 0.06)<br>P=0.02       |
| >High school                                        | 0.63<br>(0.45, 0.80)<br>P<0.001       | 1.24<br>(0.51, 1.97)<br>P=0.001    | 0.06<br>(0.01, 0.17)<br>P=0.03        | 0.04<br>(0.01, 0.06)<br>P=0.007       |
| Race/ethnicity                                      |                                       |                                    |                                       |                                       |
| Non-Hispanic white                                  | Referent                              | Referent                           | Referent                              | Referent                              |
| Mexican American                                    | -0.34<br>(-0.50, -0.17)<br>P<0.001    | -0.71<br>(-1.40, -0.02)<br>P=0.04  | -0.06<br>(-0.10, -0.01)<br>P=0.02     | -0.02<br>(-0.04, -0.0004)<br>P=0.05   |
| Other                                               | -0.67<br>(-0.93, -0.41)<br>P<0.001    | -1.64<br>(-2.72, -0.56)<br>P=0.003 | -0.06<br>(-0.14, 0.01)<br>P=0.10      | -0.04<br>(-0.08, -0.002)<br>P=0.04    |
| Body mass index per 1 unit increase                 | 0.02<br>(0.01, 0.03)<br>P<0.001       | 0.05<br>(-0.003, 0.10)<br>P=0.07   | 0.003<br>(0, 0.007)<br>P=0.06         | 0.002<br>(0.0003, 0.003)<br>P=0.02    |
| Diabetes                                            | -0.25<br>(-0.40, -0.11)<br>P<0.001    | -0.28<br>(-0.91, 0.35)<br>P=0.39   | -0.07<br>(-0.11, -0.03)<br>P=0.002    | -0.03<br>(-0.05, -0.008)<br>P=0.007   |
| NIH Stroke Scale score per 1 point increase         | -0.19<br>(-0.27, -0.11)<br>P<0.001    | -0.45<br>(-0.79, -0.11)<br>P=0.009 | -0.03<br>(-0.06, -0.01)<br>P=0.006    | -0.01<br>(-0.02, 0.001)<br>P=0.07     |
| Depressive symptoms at 90 days per 1 point increase | -0.012<br>(-0.022, -0.001)<br>P=0.03  | -0.02<br>(-0.07, 0.02)<br>P=0.26   | -0.002<br>(-0.005, 0.001)<br>P=0.28   | -0.0002<br>(-0.002, 0.001)<br>P=0.80  |

Abbreviations: SBP=systolic blood pressure. DBP=diastolic blood pressure. The Modified Mini-Mental Status Examination (3MSE) assesses global cognitive function (scores range, 0-100). The 3MSE outcome was transformed using the natural logarithm and reverse coded to have participants with worse cognition having lower scores. The Animal Fluency Test (AFT) assesses executive function (complex cognitive processing), with scores representing the number of animals generated in 30 seconds (scores range 0-10). The Trailmaking Tests (Trails) A and B assess visuomotor tracking, information processing speed, divided attention, and cognitive flexibility (scores reflected task accuracy [0-25 correct items] divided by completion time [0-180 seconds for Trails A and 0-300 seconds for Trails B]). For all cognitive tests, higher scores indicate better performance. Depressive symptoms measured using PHQ-8.

Linear regression used for Modified Mini-Mental Status Examination and Trailmaking Tests A and B. Tobit regression used for Animal Fluency Test. Models included SBP, DBP, age, education, race/ethnicity, body mass index, diabetes, NIH stroke severity score at time of index stroke, and depressive symptoms at 90 days.

533

534

**Supplemental Table 2: Association between Blood Pressure, Adherence to Antihypertensive Medication, and Cognition 90 days after Stroke: Brain Attack Surveillance in Corpus Christi Project, 2011-2013**

| <b>Estimates (95% Confidence Intervals)</b> |                                                                                                       |                                                |
|---------------------------------------------|-------------------------------------------------------------------------------------------------------|------------------------------------------------|
| <b>Coefficient</b>                          | <b>Model 5 with SBP, DBP, and Socio-demographics, and Clinical Factors from Table 2 in Manuscript</b> | <b>Model 5 plus adherence to BP medication</b> |
| <b>Outcome: 3MSE (n=348)</b>                |                                                                                                       |                                                |
| Difference per 10 mmHg increase in SBP      | 0.01<br>(-0.04, 0.06)<br><i>P</i> =0.61                                                               | 0.01<br>(-0.04, 0.06)<br><i>P</i> =0.65        |
| Difference per 10 mmHg increase in DBP      | 0.01<br>(-0.09, 0.10)<br><i>P</i> =0.92                                                               | 0.01<br>(-0.09, 0.11)<br><i>P</i> =0.86        |
| Adherent to BP medication                   | Not included                                                                                          | Referent                                       |
| Nonadherent to BP medication                | Not included                                                                                          | 0.11<br>(-0.07, 0.30)<br><i>P</i> =0.23        |
| Not prescribed BP medication                | Not included                                                                                          | -0.13<br>(-0.37, 0.11)<br><i>P</i> =0.31       |
| <b>Outcome: Animal Fluency Test (n=347)</b> |                                                                                                       |                                                |
| Difference per 10 mmHg increase in SBP      | 0.01<br>(-0.20, 0.21)<br><i>P</i> =0.95                                                               | -0.02<br>(-0.22, 0.19)<br><i>P</i> =0.86       |
| Difference per 10 mmHg increase in DBP      | -0.02<br>(-0.43, 0.40)<br><i>P</i> =0.94                                                              | 0.04<br>(-0.38, 0.46)<br><i>P</i> =0.85        |
| Adherent to BP medication                   | Not included                                                                                          | Referent                                       |
| Nonadherent to BP medication                | Not included                                                                                          | -0.24<br>(-1.03, 0.54)<br><i>P</i> =0.54       |
| Not prescribed BP medication                | Not included                                                                                          | -1.05<br>(-2.06, -0.04)<br><i>P</i> =0.04      |
| <b>Outcome: Trails A (n=276)</b>            |                                                                                                       |                                                |
| Difference per 10 mmHg increase in SBP      | -0.003<br>(-0.02, 0.01)<br><i>P</i> =0.69                                                             | -0.004<br>(-0.02, 0.01)<br><i>P</i> =0.58      |
| Difference per 10 mmHg increase in DBP      | 0.01<br>(-0.02, 0.03)<br><i>P</i> =0.66                                                               | 0.01<br>(-0.02, 0.04)<br><i>P</i> =0.54        |
| Adherent to BP medication                   | Not included                                                                                          | Referent                                       |

|                                        |                                            |                                            |
|----------------------------------------|--------------------------------------------|--------------------------------------------|
| Nonadherent to BP medication           | Not included                               | -0.02<br>(-0.08, 0.03)<br><i>P</i> =0.40   |
| Not prescribed BP medication           | Not included                               | -0.04<br>(-0.11, 0.02)<br><i>P</i> =0.22   |
| <b>Outcome: Trails B (n=229)</b>       |                                            |                                            |
| Difference per 10 mmHg increase in SBP | -0.004<br>(-0.01, 0.003)<br><i>P</i> =0.27 | -0.004<br>(-0.01, 0.003)<br><i>P</i> =0.27 |
| Difference per 10 mmHg increase in DBP | 0.01<br>(-0.01, 0.02)<br><i>P</i> =0.40    | 0.01<br>(-0.01, 0.02)<br><i>P</i> =0.39    |
| Adherent to BP medication              | Not included                               | Referent                                   |
| Nonadherent to BP medication           | Not included                               | -0.003<br>(-0.03, 0.02)<br><i>P</i> =0.84  |
| Not prescribed BP medication           | Not included                               | -0.0004<br>(-0.03, 0.03)<br><i>P</i> =0.98 |

535

536

537
